# Supplementary material for: Resveratrol inhibits the progression of cervical cancer by suppressing the transcription and expression of HPV E6 and E7 genes
Source: PubMed Central journal article supplement — Int J Mol Med. 2020 Nov 17;47(1):335–45. doi: 10.3892/ijmm.2020.4789 (PMC7723400; doi:10.3892/ijmm.2020.4789), 2020-11-17

Figure S1. Resveratrol inhibits the proliferation of cervical cancer cells. (A) HeLa and (B) Ca Ski cells were treated with resveratrol or the vehicle for 24 h, 48 h, and 72 h. Proliferation of (A) HeLa and (B) Ca Ski cells was determined using a CCK-8 kit. IC<sub>50</sub> of resveratrol on HeLa (A) and Ca Ski (B) cells was calculated. Data are presented as the means ± SD. \*P<0.05, \*\*P<0.01, compared with the vehicle control.

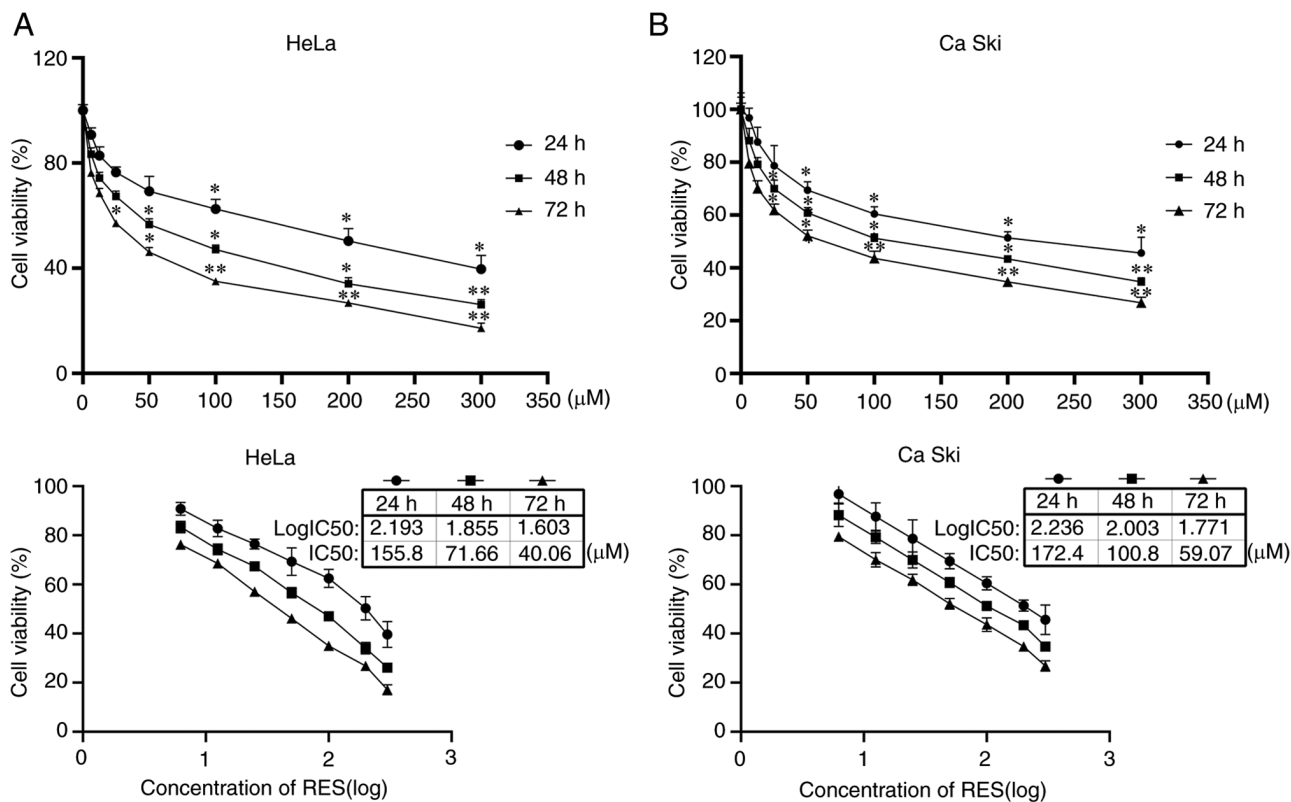

Supplement: Supplementary_Data.pdf [file Supplementary_Data.pdf]
